# Supplementary material
Source: Copernicus journal article supplement (doi:10.5194/egusphere-2026-3180)
Supplement: Supplementary file 1 [file egusphere-2026-3180-supplement.pdf]

1 **Supplement**

2

3

4 **Poleward shift of the North Pacific storm track driven by**  
5 **springtime East Asian dust heating**

6 Anbao Zhu<sup>1, 2, 3</sup>, Xin Huang<sup>1, 2</sup>, Haiming Xu<sup>3</sup>, Jiechun Deng<sup>3</sup>, Lian Xue<sup>4</sup>, Zilin Wang<sup>1,</sup>  
7 <sup>2</sup>, Ke Ding<sup>1, 2</sup>, Tianshuai Li<sup>1, 2</sup>, Aijun Ding<sup>1, 2</sup>

8 <sup>1</sup>Joint International Research Laboratory of Atmospheric and Earth System Sciences, School of  
9 Atmospheric Sciences, Nanjing University, Nanjing 210023, China

10 <sup>2</sup>State Key Laboratory of Severe Weather Meteorological Science and Technology, Nanjing University,  
11 Nanjing 210023, China

12 <sup>3</sup>School of Atmospheric Sciences, Nanjing University of Information Science & Technology, Nanjing  
13 210044, China

14 <sup>4</sup>Nanjing-Helsinki Institute in Atmospheric and Earth System Sciences, Nanjing University, Suzhou  
15 215163, China

16 *Correspondence to:* Xin Huang ([xinhuang@nju.edu.cn](mailto:xinhuang@nju.edu.cn))

17

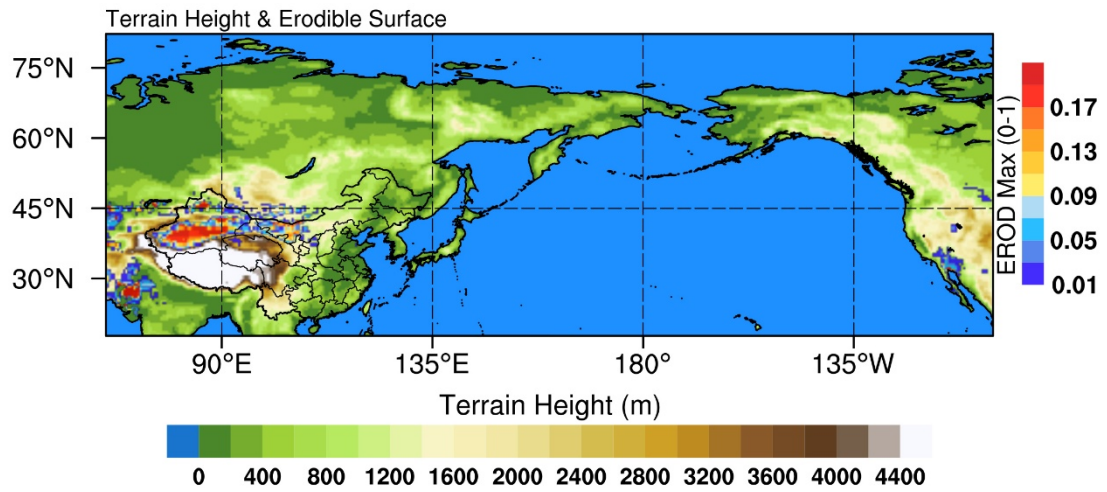

18

19 **Figure S1. Model domain configuration showing terrain height (shading; m) and the fraction of erodible**  
 20 **surface (EROD; dimensionless, 0–1) derived from the maximum across three soil types (sand, silt, and clay),**  
 21 **which serves as the dust source function in the Shao (2004) dust emission scheme implemented in WRF-Chem.**

22

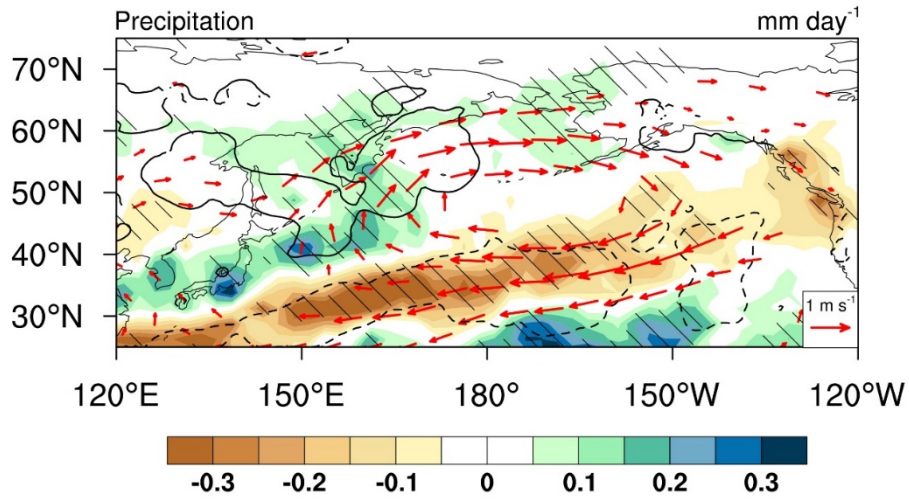

23

24 **Figure S2. Regressions of anomalies in precipitation (shading; mm day<sup>-1</sup>) and 850 hPa wind (vector; m s<sup>-1</sup>)**

25 **onto the standardized EADI\_IA. Hatching and red vectors indicate that the regressed anomalies of**

26 **precipitation and wind are statistically significant at the 95 % confidence level based on a Student's t test,**

27 **respectively. Black contours denote the statistically significant regions of the regressed  $V'T'_{850}$  anomalies**

28 **shown in Figure 3b, with solid and dashed lines representing positive and negative values, respectively.**

29
